# Supplementary material for: AMPK regulates Bcl2-L-13-mediated mitophagy induction for cardioprotection
Source: PubMed Central journal article supplement — Cell Rep. 2024 Nov 23;43(12):115001. doi: 10.1016/j.celrep.2024.115001 (PMC11672683; doi:10.1016/j.celrep.2024.115001), 2024-11-23
Supplement: mmc1.pdf [file mmc1.pdf]

**Supplemental information**

**AMPK regulates Bcl2-L-13-mediated  
mitophagy induction for cardioprotection**

**Tomokazu Murakawa, Jumpei Ito, Mara-Camelia Rusu, Manabu Taneike, Shigemiki Omiya, Javier Moncayo-Arlandi, Chiaki Nakanishi, Ryuta Sugihara, Hiroki Nishida, Kentaro Mine, Roland Fleck, Min Zhang, Kazuhiko Nishida, Ajay M. Shah, Osamu Yamaguchi, Yasushi Sakata, and Kinya Otsu**

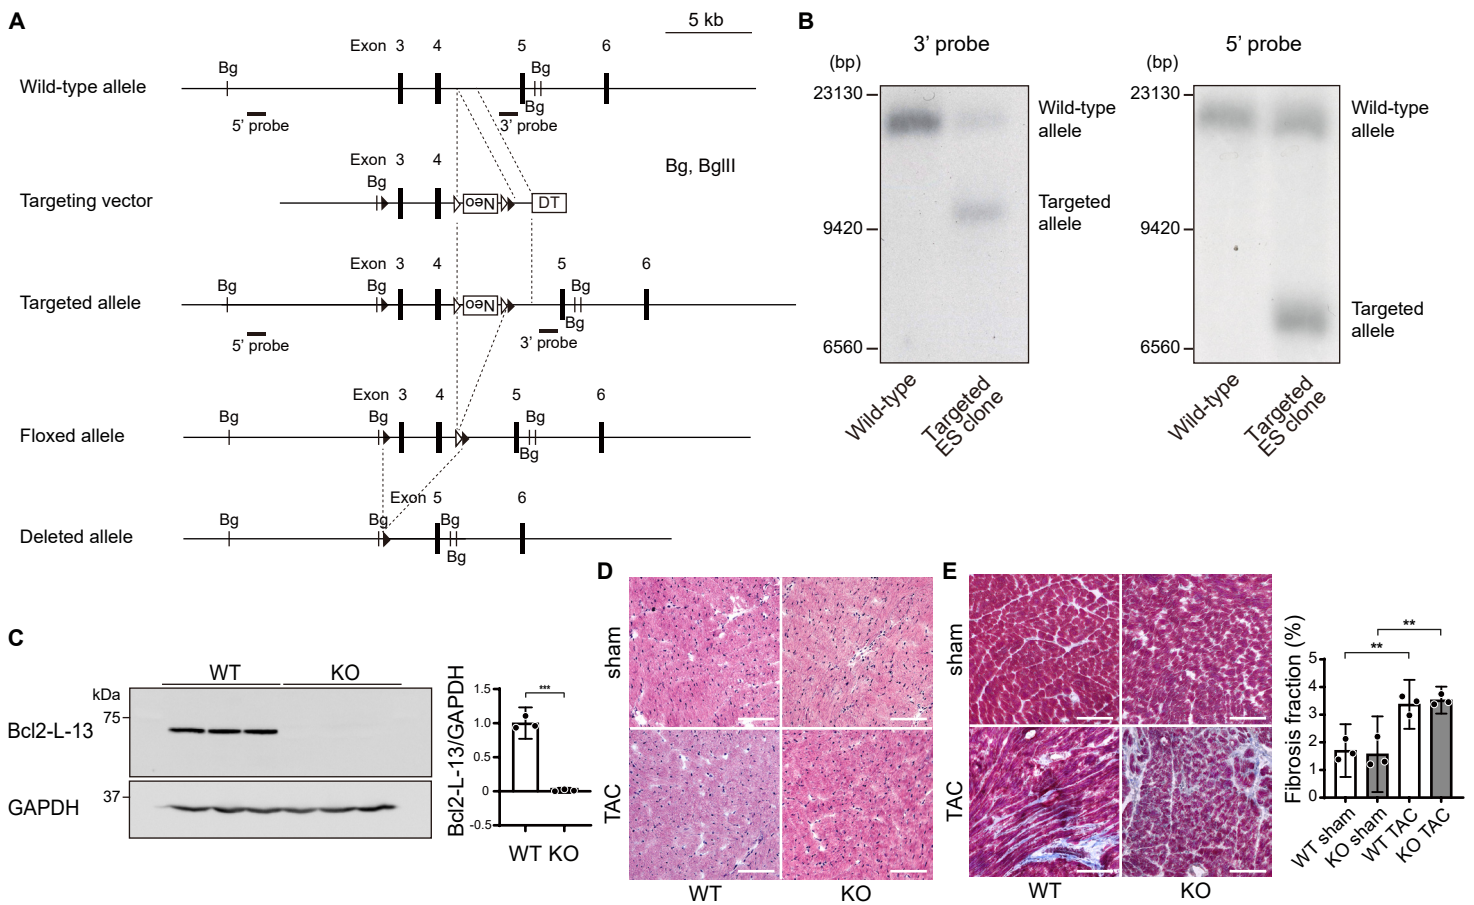

**Figure S1. Targeted modification of the *Bcl2l13* gene, and histological analyses of *Bcl2l13*<sup>-/-</sup> mice four weeks after TAC, related to Figure 1**

(A) Schematic structures of genomic *Bcl2l13* sequences, targeting vector, targeted allele, floxed allele, and *Bcl2l13*<sup>-/-</sup> (deleted) allele (from top to bottom). The black and white arrowheads represent *loxP* and flippase recognition target sites, respectively. The targeting construct includes the PGK-neo cassette (*Neo*) flanked by flippase recognition target sites and a diphtheria toxin (*DT*) gene. The bar-labeled probe corresponds to the sequence used for Southern blotting analysis in (B). Bg, BgIII restriction site.

(B) Genomic analysis of ES cells. Genomic DNA was isolated from ES cells, digested with BgIII, and analyzed via Southern blotting with 3' and 5' probes.

(C) Protein expression levels of Bcl2-L-13 in *Bcl2l13*<sup>+/+</sup> (WT) and *Bcl2l13*<sup>-/-</sup> (KO) hearts. Left ventricular homogenates from *Bcl2l13*<sup>+/+</sup> and *Bcl2l13*<sup>-/-</sup> mice were analyzed by Western blotting. The bar graph shows densitometric analysis. The average value for WT mice was set to 1 ( $n = 3$ ).

(D) Hematoxylin-eosin-stained heart sections. Scale bar, 100  $\mu$ m.

(E) Masson's trichrome-stained heart sections. Scale bar, 100  $\mu$ m. Quantitative analysis of fibrosis fraction is shown in the bar graph ( $n = 3$ ).

Results are shown as mean with 95% CI. Statistical analysis by unpaired, two-tailed *t*-test in (C) and a one-way ANOVA followed by Tukey-Kramer's *post hoc* test in (E). All pairwise comparisons were performed in Tukey-Kramer's *post hoc* test. \*\* $P < 0.01$ , \*\*\* $P < 0.001$ .

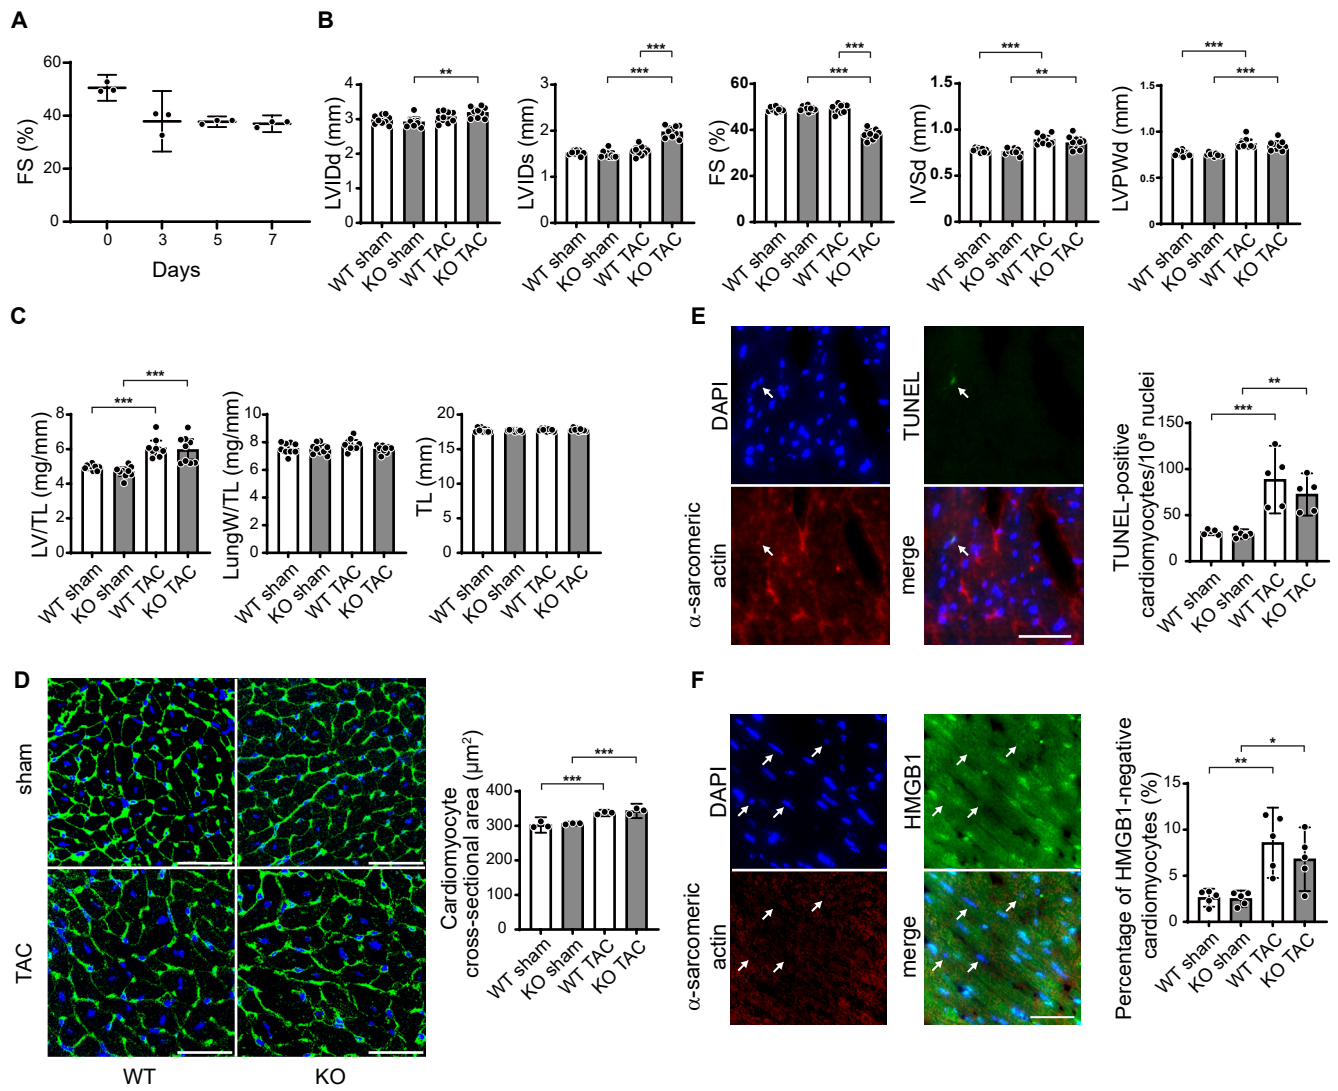

**Figure S2. Analyses of *Bcl2l13*<sup>-/-</sup> mice five days after TAC, related to Figure 2.**

(A) Analysis of fractional shortening after TAC operation in *Bcl2l13*<sup>-/-</sup> mice. Each data point represents the mean with 95% CI of 3 independent biological replicates.

(B and C) Echocardiographic parameters are shown in (B), and physiological parameters are shown in (C).  $n = 10$ .

(D) Wheat germ agglutinin-stained heart sections. Scale bar, 50  $\mu\text{m}$ . Cardiomyocyte cross-sectional areas were measured by tracing the outline of 100 myocytes in the non-fibrotic area of each section ( $n = 3$ ).

(E) Representative images of TUNEL-staining (green) in the heart sections. Arrows indicate a TUNEL-positive nucleus. Scale bar, 50  $\mu\text{m}$ . Red,  $\alpha$ -sarcomeric actin; blue, DAPI. The right graph shows a quantitative analysis of TUNEL-positive cardiomyocytes. ( $n = 5$ ).

(F) Immunofluorescence analysis of HMGB1 (green) in the heart after TAC ( $n = 5$ ). Arrows indicate HMGB1-negative nuclei. Scale bar, 50  $\mu\text{m}$ . Red,  $\alpha$ -sarcomeric actin; blue, DAPI. The right graph shows the percentage of HMGB1-negative cardiomyocytes.

Results are shown as mean with 95% CI. Statistical analysis by one-way ANOVA followed by Tukey–Kramer’s *post hoc* test. All pairwise comparisons were performed. \* $P < 0.05$ , \*\* $P < 0.01$ , \*\*\* $P < 0.001$ .

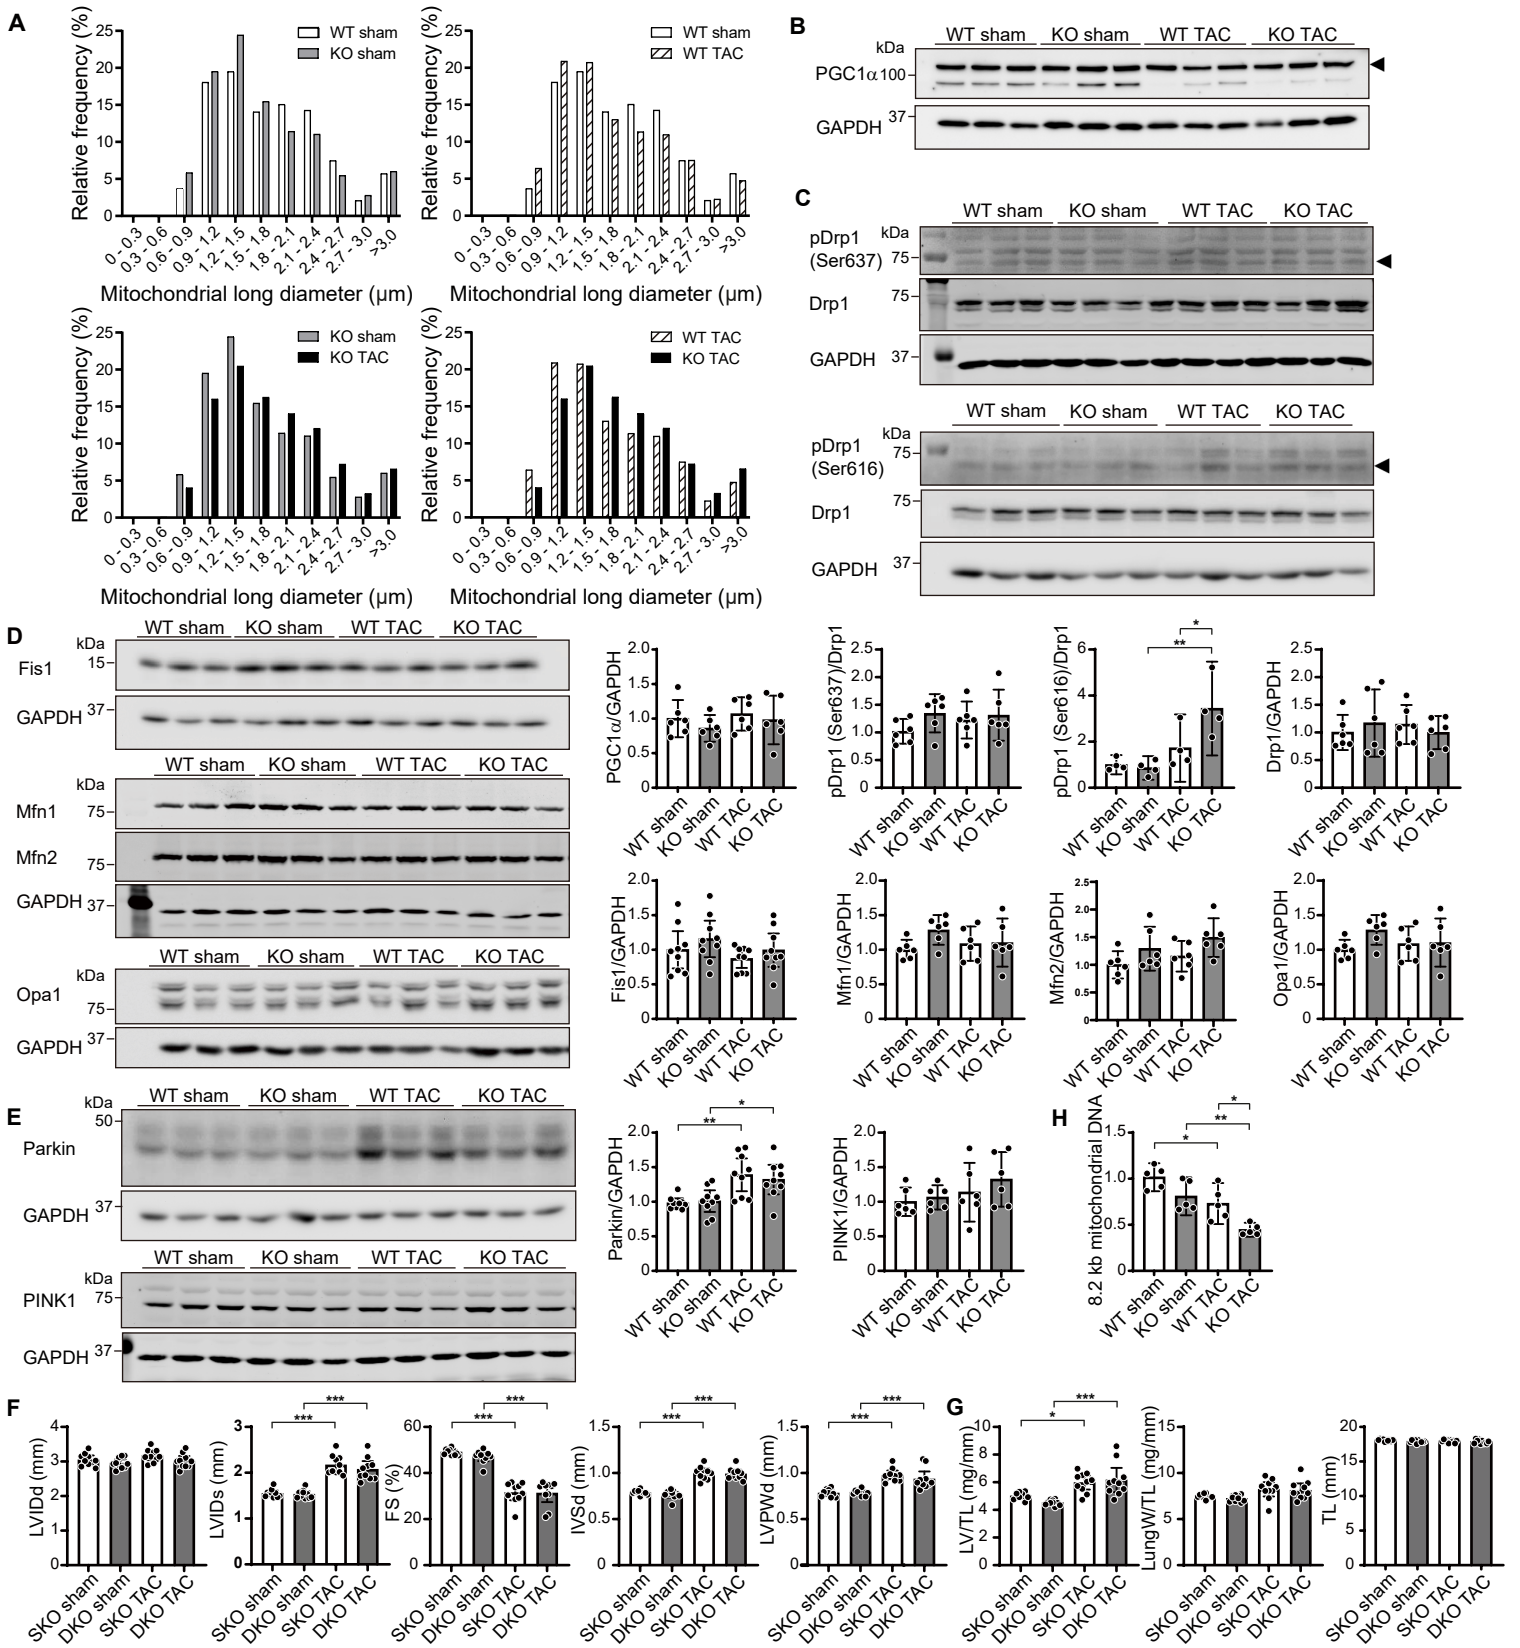

**Figure S3. Ultrastructural and biochemical analyses of *Bcl2l13*<sup>-/-</sup> mice five days after TAC and echocardiographic and physiological analyses of *Bcl2l13*<sup>-/-</sup>*Prk2*<sup>-/-</sup> mice, related to Figure 2.**

(A) A histogram visualizing the distribution of the long diameter of mitochondria measured in Figure 2B.

(B-E) Heart extracts were immunoblotted with the indicated antibodies ( $n = 4 - 9$ ). Densitometric analysis is shown in the bar graphs. The average value for the WT sham group was set to 1.

(F and G) *Bcl2l13*<sup>-/-</sup>*Prk2*<sup>+/+</sup> (SKO) and *Bcl2l13*<sup>-/-</sup>*Prk2*<sup>-/-</sup> (DKO) mice were subjected to TAC. The mice were analyzed four weeks after the TAC operation ( $n = 10$ ). Echocardiographic parameters are shown in (F), and physiological parameters are shown in (G).

(H) mitochondrial DNA (mtDNA) damage was assessed by measurement of the level of replicated 8.2 kb mtDNA using mouse Real-time PCR Mitochondrial DNA Damage Analysis Kit. The damage to the mtDNA results in the inhibition of PCR of 8.2 kb mtDNA. The average value for the WT sham group was set to 1.  $n = 5$ .

Results are shown as mean with 95% CI. Statistical analysis by one-way ANOVA followed by Tukey–Kramer's *post hoc* test. All pairwise comparisons were performed. \* $P < 0.05$ , \*\* $P < 0.01$ , \*\*\* $P < 0.001$ .

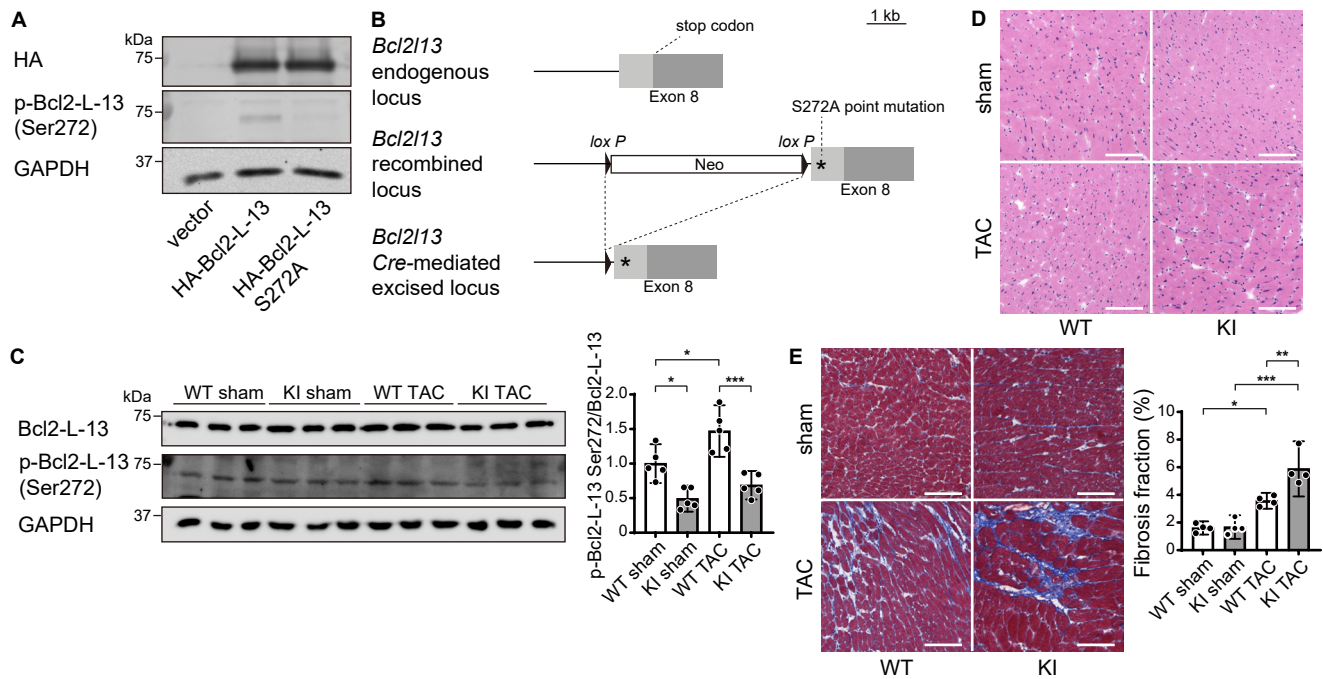

**Figure S4. Histological and protein analyses in *Bcl2-L-13* (S272A) knock-in mice four weeks after TAC, related to Figure 4**

(A) Validation of the anti-phospho-Bcl2-L-13 (Ser272) antibody. Lysates from HEK293A cells transfected with empty vector, HA-Bcl2-L-13 or HA-Bcl2-L-13 (S272A) were subjected to immunoblotting.

(B) Schematic representation of the selected targeting strategy. Hatched rectangles represent *Bcl213* coding sequences, grey rectangles indicate non-coding exon portions, black arrowheads indicate *loxP* sites, and asterisk indicate the inserted mutation.

(C) Heart extracts from *Bcl2L13*<sup>WT/WT</sup> (WT) or *Bcl2L13*<sup>S272A/S272A</sup> (KI) mice were immunoblotted with the indicated antibodies. Densitometric analysis is shown in the bar graph. The average value in the WT sham group was set to 1.  $n = 5$ .

(D) Hematoxylin-eosin-stained heart sections. Scale bar, 100  $\mu\text{m}$ .

(E) Masson's trichrome-stained heart sections. Scale bar, 100  $\mu\text{m}$ . Quantitative analysis of fibrosis fraction is shown in the bar graph ( $n = 4$ ).

Results are shown as mean with 95% CI. Statistical analysis by one-way ANOVA followed by Tukey–Kramer's *post hoc* test. \* $P < 0.05$ , \*\* $P < 0.01$ , \*\*\* $P < 0.001$ .



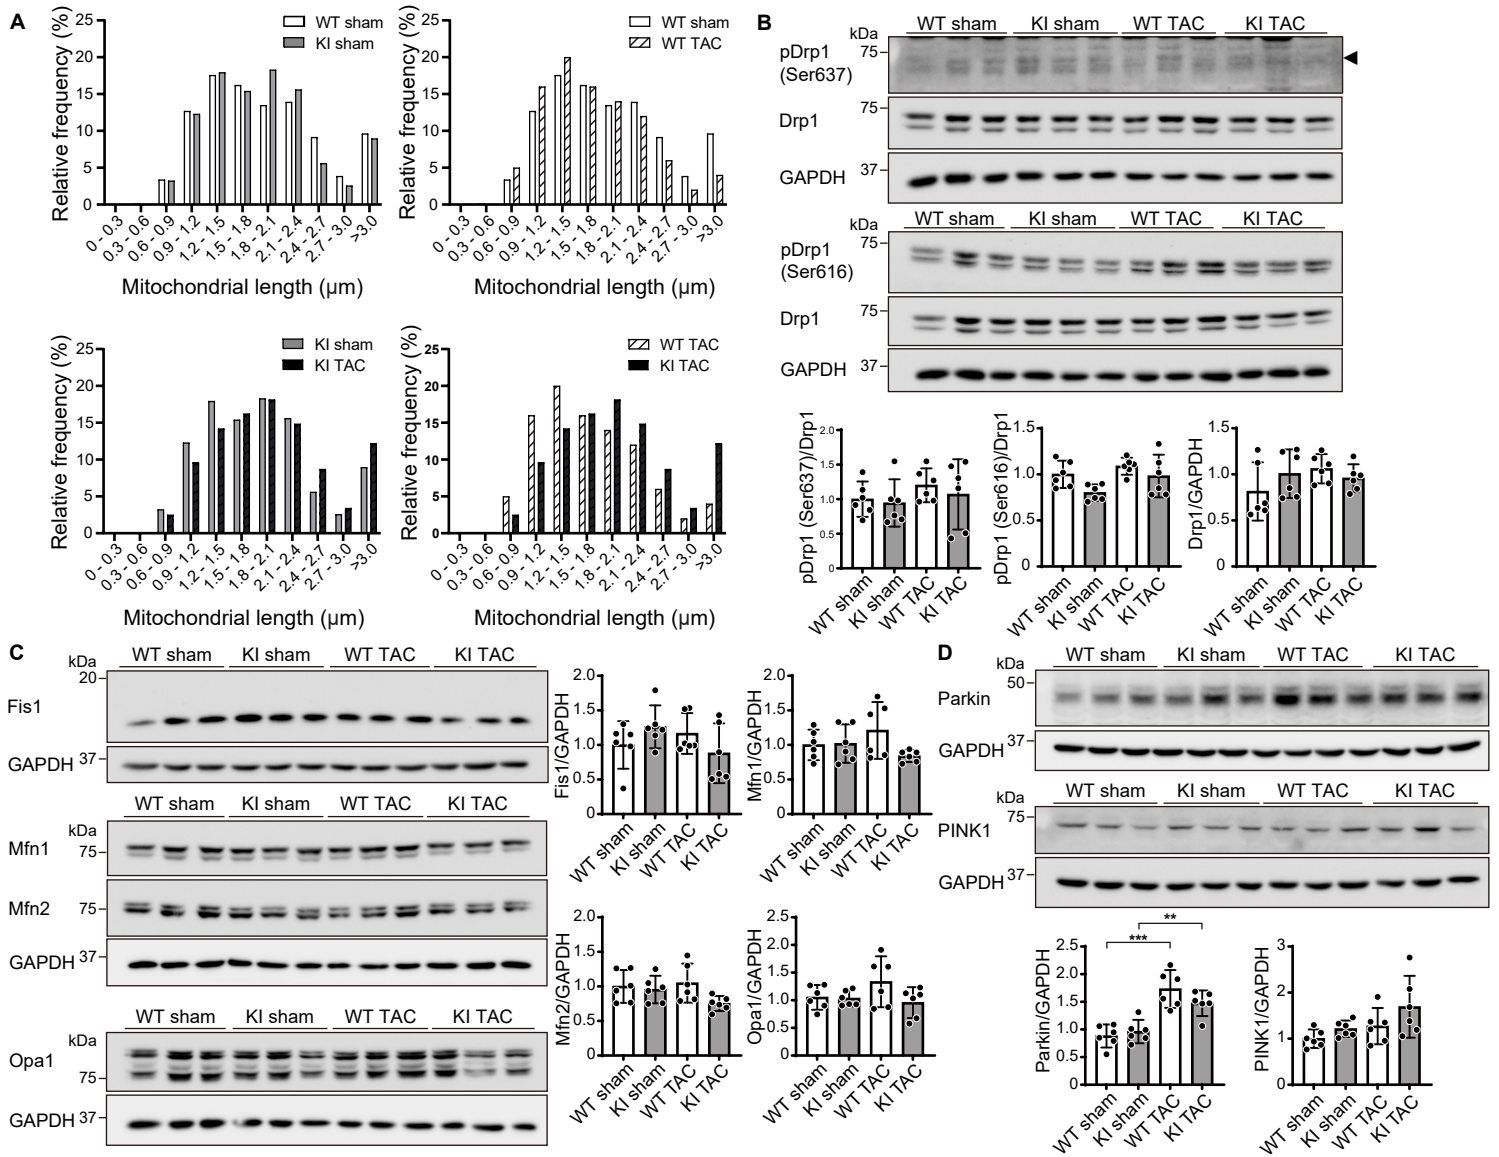

**Figure S5. Ultrastructural and protein analyses in Bcl2-L-13 (S272A) knock-in mice five days after TAC, related to Figure 5**

(A) A histogram visualizing the distribution of the long diameter of mitochondria measured in Figure 5A.

(B-D) Heart extracts were immunoblotted with the indicated antibodies. Densitometric analysis is shown in the bar graphs. The average value in the WT sham group was set to 1.  $n = 6$ .

Results are shown as mean with 95% CI. Statistical analysis by one-way ANOVA followed by Tukey–Kramer’s *post hoc* test. All pairwise comparisons were performed. \* $P < 0.05$ , \*\*\* $P < 0.001$ .

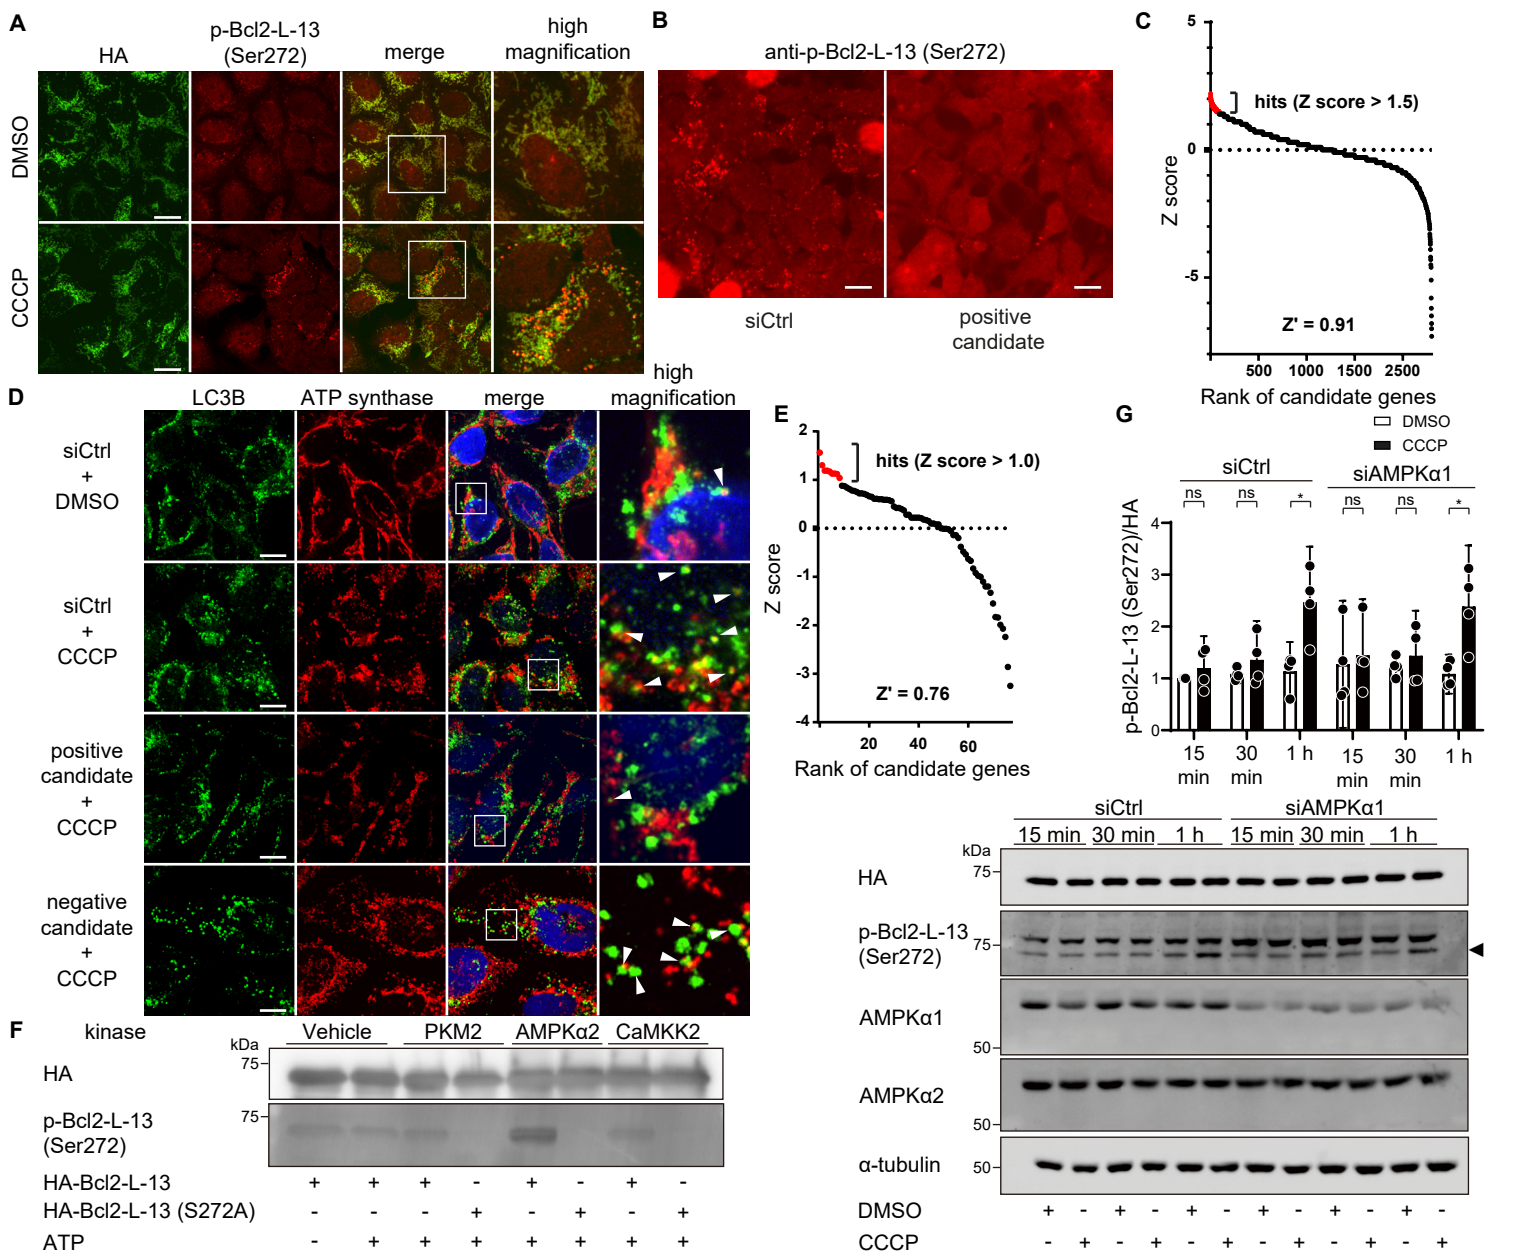

**Figure S6. Screening of the responsible kinase of Bcl2-L-13 at Ser272, related to Figure 6**

(A) HEK293A cells stably expressing HA-Bcl2-L-13 were treated with 15  $\mu$ M CCCP and 100 nM bafilomycin A1 for four hours. Cells were fixed and immunostained with anti-phospho-Bcl2-L-13 (Ser272) and anti-HA antibodies for confocal microscopy. The boxed area is shown at higher magnification in the right panel. Scale bar, 20  $\mu$ m.

(B) Representative images acquired in the primary screening. Cells were transfected with the indicated siRNAs. Seventy-two hours after transfection, cells were treated with 15  $\mu$ M CCCP and 100 nM bafilomycin A1 for four hours and immunostained with an anti-phospho-Bcl2-L-13 (Ser272) antibody for automated scanning using a fluorescence microscope. For quantification of phospho-Bcl2-L-13 (Ser272)-positive dots, local maxima were determined using the “find maxima” function of the ImageJ. Scale bar, 20  $\mu$ m.

(C) The candidate genes are ranked according to their Z score in the primary screening. The hits shown in red dots were chosen based on a Z score of greater than 1.5. The Z' factor for the primary screening was calculated using the DMSO-treated samples (positive control for inhibition) and control siRNA-treated samples (negative control for inhibition).

(D) Representative images acquired in the secondary screening. HEK293A cells were transfected with the indicated siRNAs. Seventy-two hours after transfection, cells were treated with 15  $\mu$ M CCCP and 100 nM bafilomycin A1 for four hours and immunostained with anti-LC3B and anti-ATP synthase antibodies for confocal microscopy. Images in the box at higher magnification are shown in the right panels. Arrowheads indicate the puncta recognized as colocalized by the software. Scale bar, 10  $\mu$ m.

(E) The candidate genes are ranked according to their Z score in the secondary screening. The hits shown in red dots were chosen based on a Z score of greater than 1.0. The Z' factor for the secondary screening was calculated using the DMSO-treated samples and control siRNA-treated samples.

(F) *In vitro* kinase assay. Bacterially synthesized HA-Bcl2-L-13 or HA-Bcl2-L-13 (S272A) was mixed with purified candidate proteins and ATP. After 30 minutes of incubation at 37°C, the reaction mix was subjected to Western blotting using an anti-phospho-Bcl2-L-13 antibody.

(G) The effect of AMPK $\alpha$ 1 knockdown on CCCP-induced Bcl2-L-13 phosphorylation. HEK293A cells stably expressing HA-Bcl2-L-13 were transfected with the control siRNA (siCtrl) or siAMPK $\alpha$ 1 for 72 hours. Cells were then treated with DMSO or 15  $\mu$ M CCCP for the indicated times, and cell lysates were subjected to Western blot analysis. Densitometric analysis of phospho-Bcl2-L-13 (Ser272) is shown in the bar graph. The value for the siCtrl transfection and 15-minute DMSO treatment group in each experiment was set to 1 ( $n = 4$ ). Results are shown as mean with 95% CI. Statistical analysis by unpaired, two-tailed *t*-test. \* $P < 0.05$ . ns: not significant.

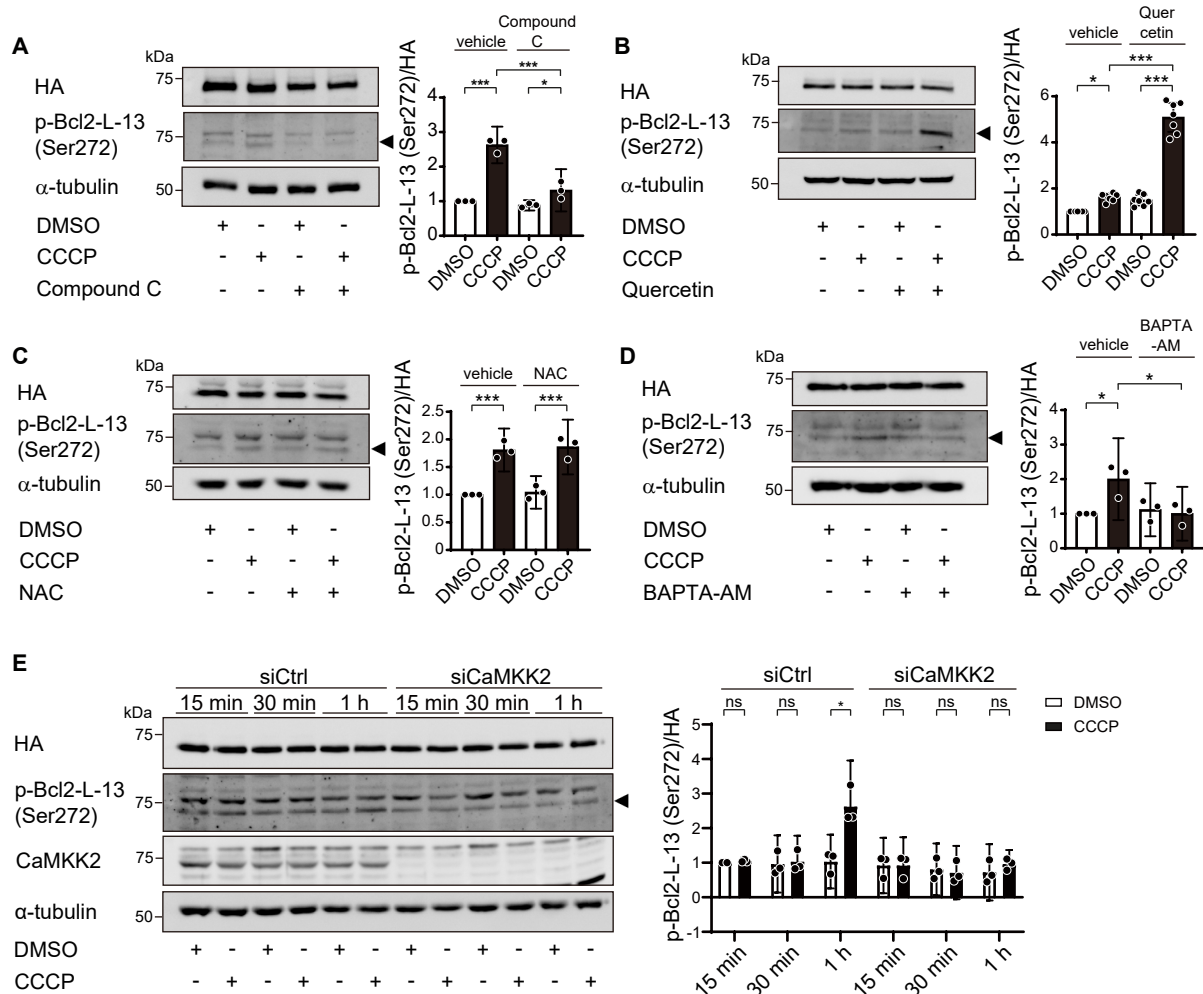

**Figure S7. Regulation of the phosphorylation of Bcl2-L-13 (Ser272), related to Figure 6**

(A-D) The effect of indicated drugs (10  $\mu$ M Compound C, or 100  $\mu$ M Quercetin, 10  $\mu$ M N-Acetyl-L-cysteine (NAC), 10  $\mu$ M BAPTA-AM) on CCCP-induced Bcl2-L-13 phosphorylation. HEK293A cells stably expressing HA-Bcl2-L-13 were treated with DMSO or CCCP and indicated drugs for one hour, and cell lysates were subjected to Western blot analysis. Densitometric analysis of phospho-Bcl2-L-13 (Ser272) is shown in the bar graph. The value for the DMSO and vehicle treatment group in each experiment was set to 1 ( $n = 3 - 7$ ).

(E) The effect of CaMKK2 knockdown on CCCP-induced Bcl2-L-13 phosphorylation. HEK293A cells stably expressing HA-Bcl2-L-13 were transfected with the control siRNA (siCtrl) or siCaMKK2 for 72 hours. Cells were then treated with DMSO or 15  $\mu$ M CCCP for the indicated times, and cell lysates were subjected to Western blot analysis. Densitometric analysis of phospho-Bcl2-L-13 (Ser272) is shown in the bar graph. The value for the siCtrl transfection and 15-minute DMSO treatment group in each experiment was set to 1 ( $n = 3$ ).

Results are shown as mean with 95% CI. Statistical analysis by one-way ANOVA followed by Tukey–Kramer’s *post hoc* test in (A-D) and unpaired, two-tailed *t*-tests in (E). All pairwise comparisons were performed. \* $P < 0.05$ , \*\* $P < 0.01$ , \*\*\* $P < 0.001$ . ns, not significant.



**Table S1. Physiological and echocardiographic parameters in 10-week-old *Bcl2l13<sup>+/+</sup>* and *Bcl2l13<sup>-/-</sup>* mice at baseline, related to Figure 1**

|                           | <i>Bcl2l13<sup>+/+</sup></i> (n = 9) |              | <i>Bcl2l13<sup>-/-</sup></i> (n = 8) |              |                   |
|---------------------------|--------------------------------------|--------------|--------------------------------------|--------------|-------------------|
|                           | mean                                 | 95% CI       | mean                                 | 95% CI       |                   |
| Body weight (g)           | 24.2                                 | 22.8 to 25.6 | 23.5                                 | 23.5 to 24.7 | <i>P</i> = 0.8700 |
| Blood pressure (mmHg)     | 93                                   | 83 to 102    | 96                                   | 89 to 102    | <i>P</i> = 0.5393 |
| Heart rate (bpm)          | 703                                  | 675 to 732   | 693                                  | 666 to 719   | <i>P</i> = 0.5230 |
| Heart weight / TL (mg/mm) | 6.7                                  | 6.3 to 7.1   | 6.5                                  | 6.1 to 6.9   | <i>P</i> = 0.4474 |
| Lung weight / TL (mg/mm)  | 7.6                                  | 7.2 to 7.9   | 7.4                                  | 7.3 to 7.5   | <i>P</i> = 0.4604 |
| TL (mm)                   | 17.5                                 | 17.3 to 17.7 | 17.6                                 | 17.5 to 17.8 | <i>P</i> = 0.1633 |
| IVSd (mm)                 | 0.75                                 | 0.73 to 0.77 | 0.76                                 | 0.73 to 0.79 | <i>P</i> = 0.3686 |
| LVIDd (mm)                | 2.95                                 | 2.84 to 3.05 | 3.01                                 | 2.92 to 3.10 | <i>P</i> = 0.3033 |
| LVIDs (mm)                | 1.48                                 | 1.43 to 1.53 | 1.52                                 | 1.46 to 1.58 | <i>P</i> = 0.2405 |
| LVPWd (mm)                | 0.74                                 | 0.73 to 0.75 | 0.76                                 | 0.74 to 0.78 | <i>P</i> = 0.1522 |
| FS (%)                    | 49.8                                 | 48.9 to 50.7 | 49.5                                 | 48.6 to 50.4 | <i>P</i> = 0.5898 |

TL, tibia length; IVSd, end-diastolic interventricular septum thickness; LVIDd, end-diastolic left ventricular internal dimension; LVIDs, end-systolic left ventricular internal dimension; LVPWd, end-diastolic left ventricular posterior wall thickness; FS, fractional shortening. Paired data were evaluated by Student's *t*-test.

**Table S2. Physiological and echocardiographic parameters in 10-week-old *Bcl2/13*<sup>WT/WT</sup> and *Bcl2/13*<sup>S272A/S272A</sup> mice at baseline, related to Figure 4**

|                           | <i>Bcl2/13</i> <sup>WT/WT</sup><br>(n = 8) |              | <i>Bcl2/13</i> <sup>S272A/S272A</sup><br>(n = 8) |              |                   |
|---------------------------|--------------------------------------------|--------------|--------------------------------------------------|--------------|-------------------|
|                           | mean                                       | 95% CI       | mean                                             | 95% CI       |                   |
| Body weight (g)           | 25.2                                       | 24.3 to 26.2 | 25.7                                             | 24.2 to 27.1 | <i>P</i> = 0.5590 |
| Blood pressure (mmHg)     | 97                                         | 86 to 107    | 102                                              | 94 to 110    | <i>P</i> = 0.3863 |
| Heart rate (bpm)          | 738                                        | 711 to 765   | 719                                              | 697 to 742   | <i>P</i> = 0.2412 |
| Heart weight / TL (mg/mm) | 6.9                                        | 6.5 to 7.2   | 6.8 ± 0.2                                        | 6.4 to 7.2   | <i>P</i> = 0.8436 |
| Lung weight / TL (mg/mm)  | 7.5                                        | 7.3 to 7.7   | 7.5                                              | 7.2 to 7.8   | <i>P</i> = 0.9157 |
| TL (mm)                   | 17.8                                       | 17.4 to 18.2 | 17.8                                             | 17.6 to 18.0 | <i>P</i> > 0.9999 |
| IVSd (mm)                 | 0.77                                       | 0.75 to 0.79 | 0.76                                             | 0.74 to 0.78 | <i>P</i> = 0.8506 |
| LVIDd (mm)                | 3.04                                       | 2.88 to 3.19 | 2.92                                             | 2.73 to 3.10 | <i>P</i> = 0.2565 |
| LVIDs (mm)                | 1.54                                       | 1.45 to 1.64 | 1.50                                             | 1.44 to 1.57 | <i>P</i> = 0.4208 |
| LVPWd (mm)                | 0.75                                       | 0.74 to 0.77 | 0.76                                             | 0.74 to 0.77 | <i>P</i> = 0.6617 |
| FS (%)                    | 49.2                                       | 48.1 to 50.4 | 49.1                                             | 48.2 to 50.0 | <i>P</i> = 0.8546 |

TL, tibia length; IVSd, end-diastolic interventricular septum thickness; LVIDd, end-diastolic left ventricular internal dimension; LVIDs, end-systolic left ventricular internal dimension; LVPWd, end-diastolic left ventricular posterior wall thickness; FS, fractional shortening. Paired data were evaluated by Student's *t*-test.

**Table S3. Candidate list after the 1st screen, related to Figure 6**

| <b>Gene symbol</b> | <b>Gene ID</b> | <b>Gene name</b>                                                  |
|--------------------|----------------|-------------------------------------------------------------------|
| AAK1               | 22848          | AP2-associated kinase 1                                           |
| ACVR1B             | 91             | activin A receptor, type IB                                       |
| ACVR2A             | 92             | activin A receptor, type IIA                                      |
| ADCK5              | 203054         | aarF domain containing kinase 5                                   |
| ADRBK1             | 156            | adrenergic, beta, receptor kinase 1                               |
| AK1                | 203            | adenylate kinase 1                                                |
| AK5                | 26289          | adenylate kinase 5                                                |
| AKAP7              | 9465           | A kinase (PRKA) anchor protein 7                                  |
| ANKK1              | 255239         | ankyrin repeat and kinase domain containing 1                     |
| AURKC              | 6795           | aurora kinase C                                                   |
| CAMK2A             | 815            | calcium/calmodulin-dependent protein kinase (CaM kinase) II alpha |
| CAMK2N1            | 55450          | calcium/calmodulin-dependent protein kinase I                     |
| CAMK1G             | 57172          | calcium/calmodulin-dependent protein kinase IG                    |
| CAMKK2             | 10645          | calcium/calmodulin-dependent protein kinase kinase 2, beta        |
| CDC42BPA           | 8476           | CDC42 binding protein kinase alpha (MRCK)                         |
| CERKL              | 375298         | ceramide kinase-like                                              |
| C9orf96            | 169436         | chromosome 9 open reading frame 96                                |
| CNKSR1             | 10256          | connector enhancer of kinase suppressor of Ras 1                  |
| CDC42BPA           | 8476           | cyclin-dependent kinase 10                                        |
| CDKL1              | 8814           | cyclin-dependent kinase-like 1 (CDC2-related kinase)              |
| DAPK2              | 23604          | death-associated protein kinase 2                                 |
| DCK                | 1633           | deoxycytidine kinase                                              |
| DGUOK              | 1716           | deoxyguanosine kinase                                             |
| EPHA3              | 2042           | EPH receptor A3                                                   |
| FASTK              | 10922          | Fas-activated serine/threonine kinase                             |
| FGFRL1             | 53834          | fibroblast growth factor receptor-like 1                          |
| FRAP1              | 2475           | FK506 binding protein 12-rapamycin associated protein 1           |

**Table S3. Candidate list after the 1st screen (continued).**

| <b>Gene symbol</b> | <b>Gene ID</b> | <b>Gene name</b>                                                                                            |
|--------------------|----------------|-------------------------------------------------------------------------------------------------------------|
| FLT1               | 2321           | fms-related tyrosine kinase 1<br>(vascular endothelial growth factor/vascular permeability factor receptor) |
| FLT3               | 2322           | fms-related tyrosine kinase 3                                                                               |
| GALK1              | 2584           | galactokinase 1                                                                                             |
| GSG2               | 83903          | germ cell associated 2 (haspin)                                                                             |
| HGS                | 9146           | hepatocyte growth factor-regulated tyrosine kinase substrate                                                |
| IPPK               | 64768          | inositol 1,3,4,5,6-pentakisphosphate 2-kinase                                                               |
| IHPK3              | 117283         | inositol hexaphosphate kinase 3                                                                             |
| IRAK2              | 3656           | interleukin-1 receptor-associated kinase 2                                                                  |
| LMTK3              | 114783         | lemur tyrosine kinase 3                                                                                     |
| LOC375133          | 375133         | -                                                                                                           |
| LOC389599          | 389599         | -                                                                                                           |
| MARK4              | 57787          | MAP/microtubule affinity-regulating kinase 4                                                                |
| MAGI3              | 260425         | membrane associated guanylate kinase, WW and PDZ domain containing 3                                        |
| MAST2              | 23139          | microtubule associated serine/threonine kinase 2                                                            |
| MAPK15             | 225689         | mitogen-activated protein kinase 15                                                                         |
| MAPK4              | 5596           | mitogen-activated protein kinase 4 (ERK4)                                                                   |
| MAP3K12            | 7786           | mitogen-activated protein kinase kinase kinase 12                                                           |
| MAP3K7             | 6885           | mitogen-activated protein kinase kinase kinase 7 (TAK1)                                                     |
| MAP4K5             | 11183          | mitogen-activated protein kinase kinase kinase kinase 5                                                     |
| MLKL               | 197259         | mixed lineage kinase domain-like                                                                            |
| NLK                | 51701          | nemo-like kinase                                                                                            |
| NTRK1              | 4914           | neurotrophic tyrosine kinase, receptor, type 1                                                              |
| NME9               | 347736         | NME/NM23 family member 9                                                                                    |
| NUAK1              | 9891           | NUAK family, SNF1-like kinase, 1                                                                            |
| PI4KB              | 5298           | phosphatidylinositol 4-kinase, catalytic, beta                                                              |
| PLXNB3             | 5365           | plexin B3                                                                                                   |
| PRKCA              | 5578           | protein kinase C, alpha                                                                                     |



**Table S3. Candidate list after the 1st screen (continued).**

| <b>Gene symbol</b> | <b>Gene ID</b> | <b>Gene name</b>                                                 |
|--------------------|----------------|------------------------------------------------------------------|
| PRKAA2             | 5563           | 5'-AMP-activated protein kinase (AMPK) catalytic subunit alpha-2 |
| PRKACB             | 5567           | protein kinase, cAMP-dependent, catalytic, beta                  |
| PRKACG             | 5568           | protein kinase, cAMP-dependent, catalytic, gamma                 |
| PKLR               | 5313           | pyruvate kinase, liver and RBC                                   |
| PKM2               | 5315           | pyruvate kinase, muscle                                          |
| RIPK3              | 11035          | receptor-interacting serine-threonine kinase 3                   |
| RYK                | 6259           | RYK receptor-like tyrosine kinase                                |
| STK10              | 6793           | serine/threonine kinase 10                                       |
| STK11              | 6794           | serine/threonine kinase 11                                       |
| STK11IP            | 114790         | serine/threonine kinase 11 interacting protein                   |
| STK16              | 8576           | serine/threonine kinase 16                                       |
| STK32A             | 202374         | serine/threonine kinase 32A                                      |
| SGK2               | 10110          | serum/glucocorticoid regulated kinase 2                          |
| TBK1               | 29110          | TANK-binding kinase 1                                            |
| TSSK4              | 283629         | testis-specific serine kinase 4                                  |
| TTC33              | 23548          | tetratricopeptide repeat domain 33                               |
| TGFBR1             | 7046           | transforming growth factor, beta receptor 1                      |
| TPR                | 7175           | translocated promoter region (to activated MET oncogene)         |
| TRIB3              | 57761          | tribbles homolog 3 (Drosophila)                                  |
| TYK2               | 7297           | tyrosine kinase 2                                                |

**Table S4. Candidate list after the 2nd screen, related to Figure 6**

## ● manual counting

| <b>Gene symbol</b> | <b>Gene ID</b> | <b>Gene name</b>                                                 | <b>Kinase type</b>                               |
|--------------------|----------------|------------------------------------------------------------------|--------------------------------------------------|
| AAK1               | 22848          | AP2-associated kinase 1                                          | Serine/threonine-protein kinase                  |
| ACVR2A             | 92             | activin A receptor, type IIA                                     | Serine/threonine-protein kinase                  |
| CAMKK2             | 10645          | calcium/calmodulin-dependent protein kinase kinase 2, beta       | Serine/threonine-protein kinase                  |
| CDC42BPA           | 8476           | CDC42 binding protein kinase alpha (MRCK)                        | Serine/threonine-protein kinase                  |
| CERKL              | 375298         | ceramide kinase-like                                             | NAD kinase                                       |
| CNKS1              | 10256          | connector enhancer of kinase suppressor of Ras 1                 | MAPK activation                                  |
| FASTK              | 10922          | Fas-activated serine/threonine kinase                            | Serine/threonine-protein kinase                  |
| GSG2               | 83903          | germ cell associated 2 (haspin)                                  | Serine/threonine-protein kinase                  |
| IRAK2              | 3656           | interleukin-1 receptor-associated kinase 2                       | Serine/threonine-protein kinase                  |
| MAP3K7             | 6885           | mitogen-activated protein kinase kinase kinase 7 (TAK1)          | Serine/threonine-protein kinase                  |
| MAPK4              | 5596           | mitogen-activated protein kinase 4 (ERK4)                        | Serine/threonine-protein kinase                  |
| MLKL               | 197259         | mixed lineage kinase domain-like                                 | Pseudokinase                                     |
| NLK                | 51701          | nemo-like kinase                                                 | Serine/threonine-protein kinase                  |
| PKLR               | 5313           | pyruvate kinase, liver and RBC                                   | pyruvate kinase                                  |
| PKM2               | 5315           | pyruvate kinase, muscle                                          | pyruvate kinase, Serine/threonine-protein kinase |
| PRKAA2             | 5563           | 5'-AMP-activated protein kinase (AMPK) catalytic subunit alpha-2 | Serine/threonine-protein kinase, Tyrosine kinase |
| RYK                | 6259           | RYK receptor-like tyrosine kinase                                | Tyrosine kinase                                  |
| TRIB3              | 57761          | tribbles homolog 3 (Drosophila)                                  | Protein kinase inhibition                        |

**Table S4. Candidate list after the 2nd screen, related to Figure 6 (continued)****● software counting**

| <b>Gene symbol</b> | <b>Gene ID</b> | <b>Gene name</b>                                                 | <b>Kinase type</b>                               |
|--------------------|----------------|------------------------------------------------------------------|--------------------------------------------------|
| MAPK4              | 5596           | mitogen-activated protein kinase 4 (ERK4)                        | Serine/threonine-protein kinase                  |
| PKLR               | 5313           | pyruvate kinase, liver and RBC                                   | pyruvate kinase                                  |
| CNKSR1             | 10256          | connector enhancer of kinase suppressor of Ras 1                 | MAPK activation                                  |
| GSG2               | 83903          | germ cell associated 2 (haspin)                                  | Serine/threonine-protein kinase                  |
| RYK                | 6259           | RYK receptor-like tyrosine kinase                                | Tyrosine kinase                                  |
| RIPK3              | 11035          | receptor-interacting serine-threonine kinase 3                   | Serine/threonine-protein kinase                  |
| PRKACB             | 5567           | protein kinase, cAMP-dependent, catalytic, beta                  | Serine/threonine-protein kinase                  |
| PRKAA2             | 5563           | 5'-AMP-activated protein kinase (AMPK) catalytic subunit alpha-2 | Serine/threonine-protein kinase                  |
| PKM2               | 5315           | pyruvate kinase, muscle                                          | Pyruvate kinase, Serine/threonine-protein kinase |
